# Supplementary material for: Calcium Oscillatory Behavior and Its Possible Role during Wound Healing in Bovine Corneal Endothelial Cells in Culture
Source: Biomed Res Int. 2019 Feb 21;2019:8647121. doi: 10.1155/2019/8647121 (PMC6409003; doi:10.1155/2019/8647121)
Supplement: Supplementary Materials — Movie 1: FCW in control conditions, 1 frame per second, duration 2 min. Movie 2: FCW in double wounding experiments, 1 frame per second, duration 2 min. Movie 3: Effect of ARL on FCW, 1 frame per second, duration 2 min. [file 8647121.f1.zip]

Archive with 3 entries (3 files):
- Movie 1.mp4
- Movie 2.mp4
- Movie 3.mp4
